# Supplementary material
Source: publisher site journal article supplement (https://www.dovepress.com/article/436284)
Supplement: Supplementary file 1 [file get_supplementary_file.php]

Table S1. Clinical Characteristics and Resistant Phenotypes of 74 carbapenem-resistant *Klebsiella pneumoniae*.

| node   | Year | City    | Location       | Age (years) | Sex    | Wards              | Specimen type | infection type                     | Surgery within 30 days | Antibiotics exposure within 30 days | Indwelling devices      |                  |              |                  | Outcome                           |
|--------|------|---------|----------------|-------------|--------|--------------------|---------------|------------------------------------|------------------------|-------------------------------------|-------------------------|------------------|--------------|------------------|-----------------------------------|
|        |      |         |                |             |        |                    |               |                                    |                        |                                     | Central venous catheter | Urinary catheter | Tracheostomy | Gastrostomy tube |                                   |
| CRK P1 | 2020 | Taiyuan | Central Shanxi | 25          | Female | Hematology         | sputum        | pneumonia                          | 1                      | 1                                   | 0                       | 0                | 0            | 0                | Remission or clinical improvement |
| CRK P2 | 2020 | Taiyuan | Central Shanxi | 25          | Female | Hematology         | swab          | pneumonia                          | 1                      | 1                                   | 0                       | 0                | 0            | 0                | Remission or clinical improvement |
| CRK P3 | 2020 | Taiyuan | Central Shanxi | 89          | Male   | RICU               | sputum        | pneumonia                          | 1                      | 1                                   | 1                       | 1                | 0            | 1                | Remission or clinical improvement |
| CRK P4 | 2020 | Taiyuan | Central Shanxi | 79          | Male   | Neurology          | sputum        | pneumonia                          | 1                      | 1                                   | 1                       | 1                | 1            | 1                | Remission or clinical improvement |
| CRK P5 | 2020 | Taiyuan | Central Shanxi | 69          | Male   | Respiratory        | sputum        | pneumonia                          | 1                      | 1                                   | 0                       | 0                | 0            | 1                | Remission or clinical improvement |
| CRK P6 | 2020 | Taiyuan | Central Shanxi | 59          | Male   | Respiratory        | secretion     | Skin and soft tissue infection     | 1                      | 1                                   | 0                       | 1                | 0            | 1                | Remission or clinical improvement |
| CRK P7 | 2020 | Taiyuan | Central Shanxi | 19          | Male   | Respiratory        | stool         | Gastrointestinal system infections | 1                      | 1                                   | 0                       | 0                | 0            | 0                | Remission or clinical improvement |
| CRK P8 | 2020 | Taiyuan | Central Shanxi | 42          | Female | Comprehensive ward | urine         | Urinary infection                  | 0                      | 0                                   | 1                       | 1                | 0            | 1                | Remission or clinical improvement |
| CRK P9 | 2020 | Taiyuan | Central Shanxi | 59          | Male   | Orthopaedics       | secretion     | Skin and soft tissue infection     | 1                      | 1                                   | 0                       | 1                | 0            | 1                | Remission or clinical improvement |

|         |      |          |                  |    |        |                        |           |                                    |   |   |   |   |   |   |                                   |
|---------|------|----------|------------------|----|--------|------------------------|-----------|------------------------------------|---|---|---|---|---|---|-----------------------------------|
| CRK P10 | 2020 | Taiyuan  | Central Shanxi   | 45 | Female | Rheumatology           | secretion | Skin and soft tissue infection     | 0 | 1 | 0 | 0 | 0 | 0 | Remission or clinical improvement |
| CRK P11 | 2020 | Taiyuan  | Central Shanxi   | 83 | Male   | Respiratory            | sputum    | pneumonia                          | 1 | 1 | 0 | 1 | 1 | 1 | Abandoned treatment               |
| CRK P12 | 2020 | Taiyuan  | Central Shanxi   | 32 | Female | Hematology             | secretion | Gastrointestinal system infections | 1 | 1 | 0 | 0 | 0 | 0 | Remission or clinical improvement |
| CRK P13 | 2020 | Taiyuan  | Central Shanxi   | 38 | Male   | Orthopaedics           | swab      | Skin and soft tissue infection     | 1 | 0 | 0 | 0 | 0 | 0 | Remission or clinical improvement |
| CRK P14 | 2020 | Taiyuan  | Central Shanxi   | 53 | Male   | ICU                    | sputum    | pneumonia                          | 1 | 1 | 0 | 1 | 1 | 1 | Remission or clinical improvement |
| CRK P15 | 2020 | Taiyuan  | Central Shanxi   | 27 | Male   | Blood transplantati on | sputum    | pneumonia                          | 1 | 1 | 0 | 0 | 0 | 0 | Abandoned treatment               |
| CRK P16 | 2020 | Jincheng | Southeast Shanxi | 27 | Male   | Blood transplantati on | swab      | pneumonia                          | 1 | 1 | 0 | 0 | 0 | 0 | Abandoned treatment               |
| CRK P17 | 2020 | Jincheng | Southeast Shanxi | 86 | Male   | Respiratory            | sputum    | pneumonia                          | 1 | 1 | 1 | 1 | 0 | 1 | Remission or clinical improvement |
| CRK P18 | 2020 | Jincheng | Southeast Shanxi | 32 | Female | Hematology             | blood     | Bloodstream infection              | 1 | 1 | 0 | 0 | 0 | 0 | Remission or clinical improvement |
| CRK P19 | 2021 | Jincheng | Southeast Shanxi | 37 | Male   | Nephrology             | sputum    | pneumonia                          | 1 | 1 | 0 | 0 | 0 | 0 | Remission or clinical improvement |
| CRK P20 | 2021 | Jincheng | Southeast Shanxi | 45 | Male   | Blood transplantati on | stool     | Urinary infection                  | 1 | 1 | 0 | 0 | 0 | 0 | Remission or clinical improvement |

|         |      |          |                  |    |        |                        |                     |                                  |   |   |   |   |   |   |                                   |
|---------|------|----------|------------------|----|--------|------------------------|---------------------|----------------------------------|---|---|---|---|---|---|-----------------------------------|
| CRK P21 | 2021 | Jincheng | Southeast Shanxi | 35 | Male   | Blood transplantati on | stool               | pneumonia                        | 1 | 1 | 0 | 0 | 0 | 0 | Abandoned treatment               |
| CRK P22 | 2021 | Yuncheng | Southern Shanxi  | 45 | Male   | Hematology             | blood               | Bloodstream infection            | 1 | 1 | 0 | 0 | 0 | 0 | Abandoned treatment               |
| CRK P23 | 2021 | Yuncheng | Southern Shanxi  | 65 | Male   | Respiratory            | sputum              | pneumonia                        | 1 | 1 | 0 | 0 | 0 | 1 | Remission or clinical improvement |
| CRK P24 | 2018 | Yuncheng | Southern Shanxi  | 65 | Male   | Hematology             | blood               | Bloodstream infection            | 1 | 1 | 0 | 0 | 0 | 0 | Remission or clinical improvement |
| CRK P25 | 2018 | Yuncheng | Southern Shanxi  | 32 | Female | Neurosurgery           | blood               | Bloodstream infection            | 0 | 1 | 0 | 0 | 1 | 1 | Remission or clinical improvement |
| CRK P26 | 2018 | Yuncheng | Southern Shanxi  | 38 | Male   | Infection              | blood               | Bloodstream infection            | 1 | 1 | 0 | 0 | 0 | 0 | Remission or clinical improvement |
| CRK P27 | 2018 | Yuncheng | Southern Shanxi  | 44 | Female | Hematology             | blood               | Bloodstream infection            | 1 | 1 | 0 | 0 | 0 | 0 | Remission or clinical improvement |
| CRK P28 | 2018 | Yuncheng | Southern Shanxi  | 76 | Female | Neurosurgery           | cerebrospinal fluid | Central nervous system infection | 1 | 1 | 0 | 1 | 0 | 1 | Remission or clinical improvement |
| CRK     | 2018 | Dato     | Northern         | 95 | Male   | ICU                    | sputu               | pneumonia                        | 0 | 1 | 1 | 1 | 0 | 1 | Remission or clinical             |

|         |      |         |                 |    |        |                 |                     |                                  |   |   |   |   |   |   |                                   |
|---------|------|---------|-----------------|----|--------|-----------------|---------------------|----------------------------------|---|---|---|---|---|---|-----------------------------------|
| P29     |      | ng      | Shanxi          |    |        |                 | m                   |                                  |   |   |   |   |   |   | improvement                       |
| CRK P30 | 2018 | Datong  | Northern Shanxi | 38 | Female | Orthopaedics    | sputum              | pneumonia                        | 1 | 1 | 1 | 1 | 1 | 1 | Remission or clinical improvement |
| CRK P31 | 2018 | Datong  | Northern Shanxi | 42 | Male   | ICU             | blood               | Bloodstream infection            | 1 | 1 | 0 | 1 | 1 | 1 | Remission or clinical improvement |
| CRK P32 | 2018 | Datong  | Northern Shanxi | 95 | Male   | ICU             | sputum              | pneumonia                        | 0 | 1 | 1 | 1 | 0 | 1 | Remission or clinical improvement |
| CRK P33 | 2018 | Datong  | Northern Shanxi | 76 | Female | Neurosurgery    | cerebrospinal fluid | Central nervous system infection | 1 | 1 | 0 | 1 | 0 | 1 | Abandoned treatment               |
| CRK P34 | 2018 | Datong  | Northern Shanxi | 71 | Female | Respiratory     | sputum              | pneumonia                        | 0 | 1 | 0 | 0 | 0 | 0 | Remission or clinical improvement |
| CRK P35 | 2018 | Datong  | Northern Shanxi | 67 | Male   | General surgery | sputum              | pneumonia                        | 1 | 1 | 1 | 1 | 0 | 1 | Remission or clinical improvement |
| CRK P36 | 2018 | Lvliang | Central Shanxi  | 57 | Male   | Hematology      | sputum              | pneumonia                        | 0 | 1 | 0 | 0 | 0 | 1 | Abandoned treatment               |
| CRK P37 | 2018 | Lvliang | Central Shanxi  | 68 | Female | Hematology      | blood               | Bloodstream infection            | 0 | 1 | 0 | 0 | 0 | 0 | Abandoned treatment               |
| CRK P38 | 2018 | Lvliang | Central Shanxi  | 48 | Male   | Emergency       | pericardial fluid   | Cardiovascular system infection  | 0 | 0 | 0 | 0 | 0 | 0 | Abandoned treatment               |
| CRK P39 | 2018 | Lvliang | Central Shanxi  | 45 | Male   | ICU             | blood               | Bloodstream infection            | 1 | 1 | 1 | 1 | 0 | 1 | Remission or clinical improvement |
| CRK P40 | 2018 | Lvliang | Central Shanxi  | 62 | Male   | ICU             | sputum              | pneumonia                        | 0 | 1 | 0 | 1 | 1 | 1 | Remission or clinical improvement |

|         |      |         |                 |    |        |                 |                |                                    |   |   |   |   |   |   |                                   |
|---------|------|---------|-----------------|----|--------|-----------------|----------------|------------------------------------|---|---|---|---|---|---|-----------------------------------|
| CRK P41 | 2018 | Lvliang | Central Shanxi  | 66 | Male   | Orthopaedics    | sputum         | pneumonia                          | 1 | 1 | 1 | 1 | 0 | 1 | Remission or clinical improvement |
| CRK P42 | 2018 | Xinzhou | Northern Shanxi | 44 | Female | Hematology      | blood          | Bloodstream infection              | 0 | 1 | 0 | 1 | 0 | 0 | Abandoned treatment               |
| CRK P43 | 2018 | Xinzhou | Northern Shanxi | 85 | Female | ICU             | secretion      | Skin and soft tissue infection     | 1 | 1 | 1 | 1 | 0 | 1 | Died                              |
| CRK P44 | 2018 | Xinzhou | Northern Shanxi | 48 | Male   | ICU             | sputum         | pneumonia                          | 0 | 1 | 0 | 1 | 0 | 1 | Abandoned treatment               |
| CRK P45 | 2018 | Xinzhou | Northern Shanxi | 78 | Female | ICU             | sputum         | pneumonia                          | 0 | 1 | 1 | 1 | 1 | 1 | Abandoned treatment               |
| CRK P46 | 2018 | Xinzhou | Northern Shanxi | 62 | Male   | Rheumatology    | blood          | Bloodstream infection              | 0 | 1 | 1 | 0 | 0 | 1 | Remission or clinical improvement |
| CRK P47 | 2018 | Xinzhou | Northern Shanxi | 54 | Male   | ICU             | sputum         | pneumonia                          | 0 | 1 | 1 | 1 | 1 | 1 | Abandoned treatment               |
| CRK P48 | 2018 | Xinzhou | Northern Shanxi | 44 | Male   | General surgery | puncture fluid | Gastrointestinal system infections | 1 | 1 | 1 | 1 | 1 | 1 | Remission or clinical improvement |
| CRK P49 | 2018 | Xinzhou | Northern Shanxi | 30 | Male   | Hematology      | sputum         | Bloodstream infection              | 1 | 1 | 0 | 0 | 0 | 0 | Abandoned treatment               |
| CRK P50 | 2018 | Xinzhou | Northern Shanxi | 88 | Male   | ICU             | sputum         | pneumonia                          | 0 | 1 | 0 | 1 | 1 | 1 | Died                              |
| CRK P51 | 2018 | Xinzhou | Northern Shanxi | 40 | Male   | ICU             | sputum         | pneumonia                          | 0 | 1 | 0 | 1 | 1 | 1 | Abandoned treatment               |
| CRK P52 | 2018 | Xinzhou | Northern Shanxi | 75 | Male   | Neurosurgery    | sputum         | pneumonia                          | 1 | 1 | 0 | 1 | 0 | 1 | Abandoned treatment               |
| CRK     | 2018 | Xinz    | Northern        | 54 | Male   | ICU             | sputu          | pneumonia                          | 0 | 1 | 1 | 1 | 1 | 0 | Died                              |

|         |      |           |                  |    |        |                         |                     |                                  |   |   |   |   |   |   |                                   |
|---------|------|-----------|------------------|----|--------|-------------------------|---------------------|----------------------------------|---|---|---|---|---|---|-----------------------------------|
| P53     |      | hou       | Shanxi           |    |        |                         | m                   |                                  |   |   |   |   |   |   |                                   |
| CRK P54 | 2018 | Jinz hong | Central Shanxi   | 56 | Male   | RICU                    | sputum              | pneumonia                        | 0 | 1 | 1 | 1 | 1 | 1 | Died                              |
| CRK P55 | 2018 | Jinz hong | Central Shanxi   | 62 | Male   | Cardio-Thoracic Surgery | blood               | Septic shock                     | 1 | 1 | 0 | 1 | 1 | 1 | Remission or clinical improvement |
| CRK P56 | 2019 | Jinz hong | Central Shanxi   | 44 | Male   | Neurosurgery            | sputum              | Central nervous system infection | 0 | 1 | 0 | 0 | 1 | 1 | Remission or clinical improvement |
| CRK P57 | 2019 | Jinz hong | Central Shanxi   | 56 | Female | Hematology              | blood               | Bloodstream infection            | 0 | 1 | 0 | 1 | 0 | 0 | Died                              |
| CRK P58 | 2019 | Jinz hong | Central Shanxi   | 52 | Male   | ICU                     | sputum              | pneumonia                        | 0 | 1 | 1 | 1 | 1 | 1 | Remission or clinical improvement |
| CRK P59 | 2019 | Changzhi  | Southeast Shanxi | 76 | Male   | Neurology               | cerebrospinal fluid | pneumonia                        | 0 | 0 | 0 | 1 | 0 | 0 | Remission or clinical improvement |
| CRK P60 | 2019 | Changzhi  | Southeast Shanxi | 62 | Male   | Hematology              | sputum              | pneumonia                        | 0 | 1 | 0 | 0 | 0 | 0 | Remission or clinical improvement |
| CRK P61 | 2019 | Changzhi  | Southeast Shanxi | 70 | Male   | Neurosurgery            | sputum              | Central nervous system infection | 0 | 1 | 1 | 1 | 1 | 1 | Remission or clinical improvement |
| CRK P62 | 2019 | Linfen    | Southern Shanxi  | 76 | Male   | ICU                     | sputum              | Central nervous system infection | 0 | 1 | 1 | 1 | 0 | 0 | Remission or clinical improvement |
| CRK     | 2021 | Linfen    | Southern         | 68 | Male   | Neurosurgery            | secret              | pneumonia                        | 1 | 1 | 0 | 1 | 1 | 1 | Remission or clinical             |

|         |      |          |                 |    |        |                 |           |           |   |   |   |   |   |   |                                   |
|---------|------|----------|-----------------|----|--------|-----------------|-----------|-----------|---|---|---|---|---|---|-----------------------------------|
| P63     |      | en       | Shanxi          |    |        | y               | ion       |           |   |   |   |   |   |   | improvement                       |
| CRK P64 | 2021 | Linf en  | Southern Shanxi | 73 | Female | Neurosurgery    | sputum    | pneumonia | 1 | 1 | 0 | 1 | 1 | 1 | Remission or clinical improvement |
| CRK P65 | 2021 | Linf en  | Southern Shanxi | 71 | Female | General surgery | pus       | pneumonia | 1 | 1 | 0 | 0 | 0 | 0 | Abandoned treatment               |
| CRK P66 | 2021 | Linf en  | Southern Shanxi | 76 | Female | Neurosurgery    | sputum    | pneumonia | 0 | 1 | 0 | 1 | 1 | 1 | Abandoned treatment               |
| CRK P67 | 2021 | Shuozhou | Northern Shanxi | 49 | Male   | Neurosurgery    | sputum    | pneumonia | 1 | 1 | 1 | 1 | 1 | 1 | Remission or clinical improvement |
| CRK P68 | 2021 | Shuozhou | Northern Shanxi | 66 | Male   | Orthopaedics    | sputum    | pneumonia | 1 | 1 | 1 | 0 | 1 | 1 | Remission or clinical improvement |
| CRK P69 | 2021 | Shuozhou | Northern Shanxi | 35 | Male   | Neurosurgery    | secretion | pneumonia | 1 | 1 | 1 | 0 | 1 | 1 | Remission or clinical improvement |
| CRK P70 | 2021 | Yanqian  | Central Shanxi  | 66 | Male   | Orthopaedics    | secretion | pneumonia | 1 | 1 | 1 | 1 | 1 | 0 | Remission or clinical improvement |
| CRK P71 | 2021 | Yanqian  | Central Shanxi  | 57 | Male   | Neurosurgery    | sputum    | pneumonia | 0 | 1 | 1 | 1 | 1 | 1 | Remission or clinical improvement |
| CRK P72 | 2021 | Yanqian  | Central Shanxi  | 47 | Female | General surgery | blood     | pneumonia | 1 | 1 | 1 | 0 | 1 | 1 | Abandoned treatment               |
| CRK     | 2021 | Yan      | Central         | 72 | Female | Urology         | urine     | Urinary   | 0 | 0 | 1 | 1 | 0 | 1 | Remission or clinical             |

|            |      |              |                   |   |      |            |            |           |   |   |   |   |   |   |                                      |
|------------|------|--------------|-------------------|---|------|------------|------------|-----------|---|---|---|---|---|---|--------------------------------------|
| P73        |      | gguan        | Shanxi            |   |      | Surgery    |            | infection |   |   |   |   |   |   | improvement                          |
| CRK<br>P74 | 2021 | Yan<br>gguan | Central<br>Shanxi | 1 | Male | Pediatrics | sputu<br>m | pneumonia | 0 | 1 | 0 | 0 | 0 | 0 | Remission or clinical<br>improvement |



Table S1. continued

| node   | Antibotypes |    |        | Antimicrobial Susceptibility Testing (S = susceptible, I = intermediate, R = resistant, ND = Not done) |           |          |           |          |             |             |          |           |                        |                         |               |              |            |            |                 |          |             |          |
|--------|-------------|----|--------|--------------------------------------------------------------------------------------------------------|-----------|----------|-----------|----------|-------------|-------------|----------|-----------|------------------------|-------------------------|---------------|--------------|------------|------------|-----------------|----------|-------------|----------|
|        | a           | b  | MAR I* | Antibotypes                                                                                            | meropenem | imipenem | ertapenem | cefaclor | ceftriaxone | ceftazidime | cefepime | Aztreonam | Cefoperazone/Sulbactam | Piperacillin/Tazobactam | ciprofloxacin | levofloxacin | Mincycline | Fosfomycin | Chloramphenicol | Amikacin | Tigecycline | Colistin |
| CRK P1 | 10          | 13 | 0.8    | A23                                                                                                    | R         | R        | ND        | ND       | R           | R           | R        | R         | R                      | R                       | R             | R            | ND         | ND         | ND              | S        | S           | S        |
| CRK P2 | 10          | 13 | 0.8    | A23                                                                                                    | R         | R        | ND        | ND       | R           | R           | R        | R         | R                      | R                       | R             | R            | ND         | ND         | ND              | S        | S           | S        |
| CRK P3 | 9           | 13 | 0.7    | A28                                                                                                    | R         | R        | ND        | ND       | R           | R           | R        | R         | R                      | S                       | R             | R            | ND         | ND         | ND              | S        | S           | S        |
| CRK P4 | 11          | 13 | 0.8    | A19                                                                                                    | R         | R        | ND        | ND       | R           | R           | R        | R         | R                      | R                       | R             | R            | ND         | ND         | ND              | S        | S           | R        |
| CRK P5 | 11          | 13 | 0.8    | A18                                                                                                    | R         | R        | ND        | ND       | R           | R           | R        | R         | R                      | R                       | R             | R            | ND         | ND         | ND              | R        | S           | S        |
| CRK P6 | 8           | 13 | 0.6    | A29                                                                                                    | R         | R        | ND        | ND       | R           | R           | R        | R         | R                      | R                       | S             | S            | ND         | ND         | ND              | S        | S           | S        |
| CRK P7 | 5           | 8  | 0.6    | A39                                                                                                    | R         | R        | ND        | ND       | ND          | ND          | ND       | R         | R                      | ND                      | ND            | R            | ND         | ND         | ND              | S        | S           | S        |
| CRK    | 1           | 1  | 0.     | A23                                                                                                    | R         | R        | ND        | N        | R           | R           | R        | R         | R                      | R                       | R             | R            | ND         | ND         | ND              | S        | S           | S        |

|            |        |        |         |     |   |   |    |        |    |    |    |   |   |    |    |   |    |    |    |   |   |   |
|------------|--------|--------|---------|-----|---|---|----|--------|----|----|----|---|---|----|----|---|----|----|----|---|---|---|
| P8         | 0      | 3      | 8       |     |   |   |    | D      |    |    |    |   |   |    |    |   |    |    |    |   |   |   |
| CRK<br>P9  | 1<br>0 | 1<br>3 | 0.<br>8 | A24 | R | R | ND | N<br>D | R  | R  | R  | R | R | R  | S  | R | ND | ND | ND | R | I | S |
| CRK<br>P10 | 1<br>0 | 1<br>3 | 0.<br>8 | A23 | R | R | ND | N<br>D | R  | R  | R  | R | R | R  | R  | R | ND | ND | ND | S | S | S |
| CRK<br>P11 | 1<br>1 | 1<br>3 | 0.<br>8 | A18 | R | R | ND | N<br>D | R  | R  | R  | R | R | R  | R  | R | ND | ND | ND | R | S | S |
| CRK<br>P12 | 9      | 1<br>3 | 0.<br>7 | A26 | R | R | ND | N<br>D | R  | R  | R  | R | R | R  | R  | I | ND | ND | ND | S | S | S |
| CRK<br>P13 | 5      | 8      | 0.<br>6 | A39 | R | R | ND | N<br>D | ND | ND | ND | R | R | ND | ND | R | ND | ND | ND | S | S | S |
| CRK<br>P14 | 9      | 1<br>3 | 0.<br>7 | A27 | R | R | ND | N<br>D | R  | R  | R  | R | R | R  | S  | R | ND | ND | ND | S | S | S |
| CRK<br>P15 | 8      | 1<br>3 | 0.<br>6 | A30 | R | R | ND | N<br>D | R  | R  | R  | R | I | S  | R  | R | ND | ND | ND | S | S | S |
| CRK<br>P16 | 5      | 8      | 0.<br>6 | A39 | R | R | ND | N<br>D | ND | ND | ND | R | R | ND | ND | R | ND | ND | ND | S | S | S |
| CRK<br>P17 | 1<br>1 | 1<br>3 | 0.<br>8 | A18 | R | R | ND | N<br>D | R  | R  | R  | R | R | R  | R  | R | ND | ND | ND | R | I | S |
| CRK<br>P18 | 7      | 1<br>3 | 0.<br>5 | A31 | R | R | ND | N<br>D | R  | R  | R  | S | R | R  | S  | S | ND | ND | ND | S | S | S |
| CRK<br>P19 | 1<br>1 | 1<br>3 | 0.<br>8 | A18 | R | R | ND | N<br>D | R  | R  | R  | R | R | R  | R  | R | ND | ND | ND | R | S | S |
| CRK<br>P20 | 6      | 8      | 0.<br>8 | A34 | R | R | ND | N<br>D | ND | ND | ND | R | R | ND | ND | R | ND | ND | ND | R | S | S |
| CRK        | 6      | 8      | 0.      | A34 | R | R | ND | N      | ND | ND | ND | R | R | ND | ND | R | ND | ND | ND | R | S | S |

|            |        |        |         |     |   |   |    |        |   |   |   |   |   |   |   |   |    |    |    |   |   |   |
|------------|--------|--------|---------|-----|---|---|----|--------|---|---|---|---|---|---|---|---|----|----|----|---|---|---|
| P21        |        |        | 8       |     |   |   |    | D      |   |   |   |   |   |   |   |   |    |    |    |   |   |   |
| CRK<br>P22 | 8      | 1<br>3 | 0.<br>6 | A31 | R | R | ND | N<br>D | R | R | R | S | R | R | R | I | ND | ND | ND | S | S | S |
| CRK<br>P23 | 8      | 1<br>3 | 0.<br>6 | A31 | R | R | ND | N<br>D | R | R | R | S | R | R | R | I | ND | ND | ND | S | S | S |
| CRK<br>P24 | 1<br>1 | 1<br>8 | 0.<br>6 | A20 | R | R | R  | R      | R | R | R | R | R | R | S | S | S  | S  | S  | S | R | S |
| CRK<br>P25 | 1<br>5 | 1<br>8 | 0.<br>8 | A5  | R | R | R  | R      | R | R | R | R | R | R | R | R | S  | R  | R  | R | S | S |
| CRK<br>P26 | 1<br>4 | 1<br>8 | 0.<br>8 | A8  | R | R | R  | R      | R | R | R | R | R | R | R | R | R  | S  | S  | S | R | S |
| CRK<br>P27 | 1<br>4 | 1<br>8 | 0.<br>8 | A9  | R | R | R  | R      | R | R | R | R | R | R | R | R | S  | S  | R  | S | R | S |
| CRK<br>P28 | 1<br>4 | 1<br>8 | 0.<br>8 | A10 | R | R | R  | R      | R | R | R | R | R | R | R | S | I  | R  | R  | S | R | S |
| CRK<br>P29 | 1<br>5 | 1<br>8 | 0.<br>8 | A4  | R | R | R  | R      | R | R | R | R | R | R | R | R | R  | S  | R  | S | R | S |
| CRK<br>P30 | 1<br>4 | 1<br>8 | 0.<br>8 | A9  | R | R | R  | R      | R | R | R | R | R | R | R | R | S  | S  | R  | S | R | S |
| CRK<br>P31 | 1<br>5 | 1<br>8 | 0.<br>8 | A4  | R | R | R  | R      | R | R | R | R | R | R | R | R | R  | S  | R  | S | R | S |
| CRK<br>P32 | 1<br>5 | 1<br>8 | 0.<br>8 | A6  | R | R | R  | R      | R | R | R | R | R | R | R | R | I  | R  | I  | R | R | S |
| CRK<br>P33 | 1<br>4 | 1<br>8 | 0.<br>8 | A11 | R | R | R  | R      | R | R | R | R | R | R | R | R | S  | R  | R  | S | S | S |
| CRK        | 1      | 1      | 0.      | A14 | R | R | R  | R      | R | R | R | R | R | R | R | R | S  | S  | R  | S | S | S |

|            |        |        |         |     |   |   |   |   |   |   |   |   |   |   |   |   |   |   |   |   |   |   |
|------------|--------|--------|---------|-----|---|---|---|---|---|---|---|---|---|---|---|---|---|---|---|---|---|---|
| P34        | 3      | 8      | 7       |     |   |   |   |   |   |   |   |   |   |   |   |   |   |   |   |   |   |   |
| CRK<br>P35 | 1<br>4 | 1<br>8 | 0.<br>8 | A7  | R | R | R | R | R | R | R | R | R | R | R | R | R | S | R | S | S | S |
| CRK<br>P36 | 1<br>3 | 1<br>8 | 0.<br>7 | A15 | R | R | R | R | R | R | R | R | R | R | S | S | R | S | R | S | R | S |
| CRK<br>P37 | 1<br>3 | 1<br>8 | 0.<br>7 | A17 | R | S | R | R | R | R | R | R | R | R | S | S | R | R | R | S | R | S |
| CRK<br>P38 | 6      | 1<br>8 | 0.<br>3 | A38 | S | S | R | R | R | R | R | S | S | S | S | S | S | S | I | S | R | S |
| CRK<br>P39 | 1<br>3 | 1<br>8 | 0.<br>7 | A14 | R | R | R | R | R | R | R | R | R | R | R | R | S | I | R | S | S | S |
| CRK<br>P40 | 1<br>7 | 1<br>8 | 0.<br>9 | A1  | R | R | R | R | R | R | R | R | R | R | R | R | R | R | R | R | R | S |
| CRK<br>P41 | 1<br>5 | 1<br>8 | 0.<br>8 | A4  | R | R | R | R | R | R | R | R | R | R | R | R | R | S | R | S | R | S |
| CRK<br>P42 | 1<br>1 | 1<br>8 | 0.<br>6 | A21 | R | R | R | R | R | R | R | S | R | R | S | S | I | S | R | S | R | S |
| CRK<br>P43 | 1<br>4 | 1<br>8 | 0.<br>8 | A12 | R | R | R | R | R | R | R | R | R | S | R | R | R | S | R | S | R | S |
| CRK<br>P44 | 1<br>3 | 1<br>8 | 0.<br>7 | A14 | R | R | R | R | R | R | R | R | R | R | R | R | S | S | R | S | S | S |
| CRK<br>P45 | 1<br>3 | 1<br>8 | 0.<br>7 | A14 | R | R | R | R | R | R | R | R | R | R | R | R | S | S | R | S | S | S |
| CRK<br>P46 | 1<br>3 | 1<br>8 | 0.<br>7 | A14 | R | R | R | R | R | R | R | R | R | R | R | R | S | S | R | S | S | S |
| CRK        | 1      | 1      | 0.      | A22 | S | I | R | R | R | R | R | R | R | R | R | R | S | S | R | S | S | S |

|            |        |        |         |     |   |   |   |   |   |   |   |   |   |   |   |   |   |   |   |   |   |   |
|------------|--------|--------|---------|-----|---|---|---|---|---|---|---|---|---|---|---|---|---|---|---|---|---|---|
| P47        | 1      | 8      | 6       |     |   |   |   |   |   |   |   |   |   |   |   |   |   |   |   |   |   |   |
| CRK<br>P48 | 1<br>3 | 1<br>8 | 0.<br>7 | A14 | R | R | R | R | R | R | R | R | R | R | R | R | S | S | R | S | S | S |
| CRK<br>P49 | 1<br>4 | 1<br>8 | 0.<br>8 | A13 | R | R | R | R | R | R | R | R | S | R | S | R | R | R | R | S | R | S |
| CRK<br>P50 | 1<br>3 | 1<br>8 | 0.<br>7 | A14 | R | R | R | R | R | R | R | R | R | R | R | R | S | S | R | S | S | S |
| CRK<br>P51 | 1<br>3 | 1<br>8 | 0.<br>7 | A14 | R | R | R | R | R | R | R | R | R | R | R | R | S | S | R | S | S | S |
| CRK<br>P52 | 1<br>5 | 1<br>8 | 0.<br>8 | A5  | R | R | R | R | R | R | R | R | R | R | R | R | S | R | R | R | S | S |
| CRK<br>P53 | 1<br>3 | 1<br>8 | 0.<br>7 | A14 | R | R | R | R | R | R | R | R | R | R | R | R | S | S | R | S | S | S |
| CRK<br>P54 | 1<br>5 | 1<br>8 | 0.<br>8 | A3  | R | R | R | R | R | R | R | R | R | R | R | R | R | I | R | R | S | S |
| CRK<br>P55 | 1<br>4 | 1<br>8 | 0.<br>8 | A7  | R | R | R | R | R | R | R | R | R | R | R | R | R | I | R | S | S | S |
| CRK<br>P56 | 1<br>5 | 1<br>8 | 0.<br>8 | A4  | R | R | R | R | R | R | R | R | R | R | R | R | R | S | R | S | R | S |
| CRK<br>P57 | 1<br>3 | 1<br>8 | 0.<br>7 | A12 | S | R | R | R | R | R | R | R | R | I | R | R | R | I | R | S | R | S |
| CRK<br>P58 | 1<br>3 | 1<br>8 | 0.<br>7 | A16 | R | I | R | R | R | R | R | R | R | R | R | R | R | S | R | S | S | S |
| CRK<br>P59 | 1<br>4 | 1<br>8 | 0.<br>8 | A7  | R | R | R | R | R | R | R | R | R | R | R | R | R | S | R | S | S | S |
| CRK        | 1      | 1      | 0.      | A7  | R | R | R | R | R | R | R | R | R | R | R | R | R | S | R | S | S | S |

|            |        |        |         |     |   |   |    |        |    |    |    |   |   |    |    |   |    |    |    |   |   |   |   |
|------------|--------|--------|---------|-----|---|---|----|--------|----|----|----|---|---|----|----|---|----|----|----|---|---|---|---|
| P60        | 4      | 8      | 8       |     |   |   |    |        |    |    |    |   |   |    |    |   |    |    |    |   |   |   |   |
| CRK<br>P61 | 1<br>6 | 1<br>8 | 0.<br>9 | A2  | R | R | R  | R      | R  | R  | R  | R | R | R  | R  | R | R  | R  | R  | R | R | S | S |
| CRK<br>P62 | 1<br>7 | 1<br>8 | 0.<br>9 | A1  | R | R | R  | R      | R  | R  | R  | R | R | R  | R  | R | R  | R  | R  | R | R | R | S |
| CRK<br>P63 | 6      | 1<br>3 | 0.<br>5 | A35 | R | R | S  | N<br>D | R  | ND | R  | R | R | S  | S  | S | ND | ND | ND | S | S | S |   |
| CRK<br>P64 | 2      | 8      | 0.<br>3 | A44 | R | R | ND | N<br>D | ND | ND | ND | S | S | ND | ND | S | ND | ND | ND | S | S | S |   |
| CRK<br>P65 | 6      | 1<br>3 | 0.<br>5 | A37 | R | R | R  | N<br>D | R  | ND | R  | S | S | S  | S  | S | ND | ND | ND | S | R | S |   |
| CRK<br>P66 | 6      | 1<br>3 | 0.<br>5 | A36 | R | R | R  | N<br>D | R  | ND | R  | R | I | S  | I  | I | ND | ND | ND | S | I | S |   |
| CRK<br>P67 | 7      | 1<br>4 | 0.<br>5 | A33 | R | R | R  | N<br>D | R  | ND | R  | R | I | S  | S  | I | R  | ND | ND | S | S | S |   |
| CRK<br>P68 | 4      | 8      | 0.<br>5 | A40 | R | R | ND | N<br>D | ND | ND | ND | R | R | ND | ND | I | ND | ND | ND | S | S | S |   |
| CRK<br>P69 | 3      | 1<br>2 | 0.<br>3 | A43 | R | S | ND | N<br>D | R  | ND | R  | S | S | S  | S  | S | ND | ND | ND | S | I | S |   |
| CRK<br>P70 | 4      | 8      | 0.<br>5 | A40 | R | R | ND | N<br>D | ND | ND | ND | R | R | ND | ND | I | ND | ND | ND | S | S | S |   |
| CRK<br>P71 | 8      | 1<br>3 | 0.<br>6 | A32 | R | R | S  | N<br>D | R  | ND | R  | R | S | S  | R  | R | ND | ND | ND | R | S | S |   |
| CRK<br>P72 | 1<br>0 | 1<br>2 | 0.<br>8 | A25 | R | R | ND | N<br>D | R  | ND | R  | R | R | R  | R  | R | ND | ND | ND | R | S | S |   |
| CRK        | 4      | 1      | 0.      | A42 | R | R | ND | N      | R  | ND | R  | S | S | S  | S  | S | ND | ND | ND | S | S | S |   |

|            |   |        |         |     |   |   |    |        |   |    |   |   |   |   |   |   |    |    |    |   |   |   |
|------------|---|--------|---------|-----|---|---|----|--------|---|----|---|---|---|---|---|---|----|----|----|---|---|---|
| P73        |   | 2      | 3       |     |   |   |    | D      |   |    |   |   |   |   |   |   |    |    |    |   |   |   |
| CRK<br>P74 | 4 | 1<br>2 | 0.<br>3 | A41 | S | R | ND | N<br>D | R | ND | R | R | I | S | I | S | ND | ND | ND | S | S | S |

\* Multiple antibiotic resistance index (MARI) was measured as a/b, where a = the total number of antibiotics to which an isolate was resistant and b = the total number of antibiotics tested.

Table S2. The sequence of primers for antibiotic resistant gene and virulence gene.

| Primers                      | Primer sequences 5'-3'                                       | Length(bp) | The annealing temperature |
|------------------------------|--------------------------------------------------------------|------------|---------------------------|
| Ambler A group carbapenemase |                                                              |            |                           |
| KPC                          | F: TGTCACTGTATCGCCGTC<br>R: CTCAGTGCTCTACAGAAAACC            | 1010       | 58°C                      |
| NMC                          | A: GCATTGATATACCTTTAGCAGAGA<br>B: CGGTGATAAAAATCACACTGAGCATA | 2158       | 54°C                      |
| SME                          | A: AGATAGTAAATTTTATAG<br>B: CTCTAACGCTAATAG                  | 1138       | 54°C                      |
| IMI                          | A: ATAGCCATCCTTGTTTAGCTC<br>B: TCTGCGATTACTTTATCCTC          | 818        | 54°C                      |
| GES                          | C: GTTTTGCAATGTGCTCAACG<br>D: TGCCATAGCAATAGGCGTAG           | 371        | 54°C                      |
| Ambler B group carbapenemase |                                                              |            |                           |
| NDM                          | F: ATGGAATTGCCCAATATTATGCAC<br>R: TCAGCGCAGCTTGTCGGC         | 816        | 61°C                      |
| IMP-1,4,5,6,9,10,18          | F: TGAGCAAGTTATCTGTATTC<br>R: TTAGTTGCTTGGTTTTGATG           | 740        | 55°C                      |
| IMP-2,8,13,19,20             | F: GGCAGTCGCCCTAAAACAAA<br>R: TAGTACTTGGCTGTGATGG            | 678        | 55°C                      |
| VIM-1,2,4,5                  | F: TTATGGAGCAGCAACCGATGT<br>R: CAAAAGTCCCCTCCAACGA           | 920        | 55°C                      |
| VIM-2,6,8-11                 | F: AAAGTTATGCCGCACTCACC<br>R: TGCAACTTCATGTTATGCCG           | 865        | 55°C                      |
| SPM-1                        | F: CCTACAATCTAACGGCGACC<br>R: TCGCCGTGTCCAGGTATAAC           | 650        | 54°C                      |
| GIM-1                        | F: AGAACCTTGACCGAACGCAG<br>R: ACTCATGACTCCTCACGAGG           | 748        | 54°C                      |
| SIM-1                        | F: TACAAGGATTCGGCATCG<br>R: TAATGGCCTGTCCCATGTG              | 571        | 54°C                      |
| AmpC enzyme gene             |                                                              |            |                           |
| DHA                          | F: CTGATGAAAAATCGTTATC<br>R: ATTCCAGTGCCTCAAATA              | 1141       | 56°C                      |
| CMY                          | F: TGTCAACACGGTGCAAATCA<br>R: AGCAACGACGGGCAAATG             | 1346       | 56°C                      |
| ACT                          | F: CGAACGAATCATTATTCAGCACCG<br>R: CGGCAATGTTACTACACAGCG      | 1518       | 56°C                      |
| Ambler D group carbapenemase |                                                              |            |                           |
| OXA-48-like                  | F: GCGTGGTTAAGGATGAACAC<br>R: CATCAAGTTCAACCCAACCG           | 438        | 55°C                      |
| OXA-23-like                  | F: GATCGGATTGGAGAACCAGA                                      | 501        | 55°C                      |



|                                  |                                                                                        |      |      |
|----------------------------------|----------------------------------------------------------------------------------------|------|------|
|                                  | R: ATTTCTGACCGCATTTCAT                                                                 |      |      |
| OXA-24-like                      | F: GGTTAGTTGGCCCCCTAAA<br>R: AGTTGAGCGAAAAGGGGATT                                      | 246  | 55°C |
| OXA-58-like                      | F: AAGTATTGGGGCTTGTGCTG<br>R: CCCCTCTGCGCTCTACATAC                                     | 353  | 55°C |
| OXA-51-like                      | F: TAATGCTTTGATCGGCCTTG<br>R: TGGATTGCACTTCATCTTGG                                     | 599  | 55°C |
| ESBLs gene                       |                                                                                        |      |      |
| CTX-M-1,3,10-12,15               | F: TTTCGGAAGCATAAAATCGG<br>R: GGCGATAAAACAAAAACGGAA                                    | 1021 | 56°C |
| CTX-M-2, 4-7,<br>Toho-1          | F: ATGATGACTCAGAGCATTCTG<br>R: TCCCGACGGCTTCCGCCTT                                     | 832  | 65°C |
| CTX-M-9, 13-14,<br>16-19, Toho-2 | F: AAAAATGATTGAAAGGTGGT<br>R: GTGAAGAAGGTGTTGCTGAC                                     | 1242 | 56°C |
| SHV                              | F: AGCCGCTTGAGCAAATTAAC<br>R: ATCCCGCAGATAAATCACCAC                                    | 713  | 62°C |
| TEM                              | F: CATTTCCGTGTCGCCCTTATTC<br>R: CGTTCATCCATAGTTGCCTGAC                                 | 800  | 62°C |
| Virulence gene                   |                                                                                        |      |      |
| iucA                             | F: AATCAATGGCTATTCCCGCTG<br>R: CGCTTCACTTCTTTCACTGACAGG                                | 239  | 59°C |
| iutA                             | F: AATCACCTGGGGGCTGGATGCT<br>R: CCGCACCTTCCACGCCGTAAAT                                 | 683  | 58°C |
| iroN                             | F: CCGCAAAGAGACGAACCGCCTT<br>R: CGGGCAATCCCCGCTTTGACTT                                 | 546  | 58°C |
| rmpA                             | F: GAGTAGTTAATAAAAATCAATAGCAAT<br>R: CAGTAGGCATTGCAGCA                                 | 332  | 50°C |
| rmpA2                            | F: GTGCAATAAGGATGTTACATTA<br>R: GGATGCCCTCCTCCTG                                       | 430  | 50°C |
| ureA                             | F: GCTGACTTAAGAGAACGTTATG<br>R: GATCATGGCGCTACCT(C/T)A                                 | 337  | 55°C |
| ugeA                             | F: GATCATCCGGTCTCCCTGTA<br>R: TCTTCACGCCTTCCTTCACT                                     | 534  | 53°C |
| fimH                             | F: GCTCTGGCCGATAC(C/T)AC(C/G)ACGG<br>R:<br>GC(G/A)(A/T)A(G/A)TAACG(T/C)GCCTGGA<br>ACGG | 423  | 55°C |
| mrkD                             | F: TAT(T/C)G(G/T)CTTAATGGCGCTGG<br>R: TAATCGTACGTCAGGTTAAAGA(C/T)C                     | 920  | 50°C |
| kfu                              | F: GAAGTGACGCTGTTTCTGGC<br>R: TTTCGTGTGGCCAGTACTC                                      | 797  | 55°C |
| Peg344                           | F: CTTGAAACTATCCCTCCAGTC<br>R: CCAGCGAAAGAATAACCCC                                     | 508  | 53°C |

|        |                                                      |     |      |
|--------|------------------------------------------------------|-----|------|
| Peg589 | F: TGAACCCCTGAAGGTCTATC<br>R: GTGATGAATAAACTACTGCGGC | 236 | 55°C |
|--------|------------------------------------------------------|-----|------|

Table S3. Antibiotypes (antibiotic resistance patterns) of 74 carbapenem-resistant *Klebsiella pneumoniae* isolates.

| Antibiotypes | Number of resistant antibiotics | MARI* | Isolates | Antibiotypes                                                        |
|--------------|---------------------------------|-------|----------|---------------------------------------------------------------------|
| A1           | 17                              | 0.9   | 2 (2.7)  | MEM-IPM-ETM-CCL-CRO-CAZ-FEP-ATM-CSL-TZP-CIP-LVX-MIN-FOS-CHL-AMK-TGC |
| A2           | 16                              | 0.9   | 1 (1.4)  | MEM-IPM-ETM-CCL-CRO-CAZ-FEP-ATM-CSL-TZP-CIP-LVX-MIN-FOS-CHL-AMK     |
| A3           | 15                              | 0.8   | 1 (1.4)  | MEM-IPM-ETM-CCL-CRO-CAZ-FEP-ATM-CSL-TZP-CIP-LVX-MIN-CHL-AMK         |
| A4           | 15                              | 0.8   | 4 (5.4)  | MEM-IPM-ETM-CCL-CRO-CAZ-FEP-ATM-CSL-TZP-CIP-LVX-MIN-CHL-TGC         |
| A5           | 15                              | 0.8   | 2 (2.7)  | MEM-IPM-ETM-CCL-CRO-CAZ-FEP-ATM-CSL-TZP-CIP-LVX-FOS-CHL-AMK         |
| A6           | 15                              | 0.8   | 1 (1.4)  | MEM-IPM-ETM-CCL-CRO-CAZ-FEP-ATM-CSL-TZP-CIP-LVX-FOS-AMK-TGC         |
| A7           | 14                              | 0.8   | 4 (5.4)  | MEM-IPM-ETM-CCL-CRO-CAZ-FEP-ATM-CSL-TZP-CIP-LVX-MIN-CHL             |
| A8           | 14                              | 0.8   | 1 (1.4)  | MEM-IPM-ETM-CCL-CRO-CAZ-FEP-ATM-CSL-TZP-CIP-LVX-MIN-TGC             |
| A9           | 14                              | 0.8   | 2 (2.7)  | MEM-IPM-ETM-CCL-CRO-CAZ-FEP-ATM-CSL-TZP-CIP-LVX-CHL-TGC             |
| A10          | 14                              | 0.8   | 1 (1.4)  | MEM-IPM-ETM-CCL-CRO-CAZ-FEP-ATM-CSL-TZP-CIP-FOS-CHL-TGC             |
| A11          | 14                              | 0.8   | 1 (1.4)  | MEM-IPM-ETM-CCL-CRO-CAZ-FEP-ATM-CSL-TZP-CIP-LVX-FOS-CHL             |
| A12          | 14                              | 0.8   | 2 (2.7)  | MEM-IPM-ETM-CCL-CRO-CAZ-FEP-ATM-CSL-CIP-LVX-MIN-CHL-TGC             |
| A13          | 14                              | 0.8   | 1 (1.4)  | MEM-IPM-ETM-CCL-CRO-CAZ-FEP-ATM-TZP-LVX-MIN-FOS-CHL-TGC             |
| A14          | 13                              | 0.7   | 9 (12.2) | MEM-IPM-ETM-CCL-CRO-CAZ-FEP-ATM-CSL-TZP-CIP-LVX-CHL                 |
| A15          | 13                              | 0.7   | 1 (1.4)  | MEM-IPM-ETM-CCL-CRO-CAZ-FEP-ATM-CSL-TZP-MIN-CHL-TGC                 |
| A16          | 13                              | 0.7   | 1 (1.4)  | MEM-ETM-CCL-CRO-CAZ-FEP-ATM-CSL-TZP-CIP-LVX-MIN-CHL                 |
| A17          | 13                              | 0.7   | 1 (1.4)  | MEM-ETM-CCL-CRO-CAZ-FEP-ATM-CSL-TZP-MIN-FOS-CHL-TGC                 |
| A18          | 11                              | 0.8   | 4 (5.4)  | MEM-IPM-CRO-CAZ-FEP-ATM-CSL-TZP-CIP-LVX-AMK                         |
| A19          | 11                              | 0.8   | 1 (1.4)  | MEM-IPM-CRO-CAZ-FEP-ATM-CSL-TZP-CIP-LVX-CO                          |

|     |    |     |         |                                             |
|-----|----|-----|---------|---------------------------------------------|
| A20 | 11 | 0.6 | 1 (1.4) | MEM-IPM-ETM-CCL-CRO-CAZ-FEP-ATM-CSL-TZP-TGC |
| A21 | 11 | 0.6 | 1 (1.4) | MEM-IPM-ETM-CCL-CRO-CAZ-FEP-CSL-TZP-CHL-TGC |
| A22 | 11 | 0.6 | 1 (1.4) | ETM-CCL-CRO-CAZ-FEP-ATM-CSL-TZP-CIP-LVX-CHL |
| A23 | 10 | 0.8 | 4 (5.4) | MEM-IPM-CRO-CAZ-FEP-ATM-CSL-TZP-CIP-LVX     |
| A24 | 10 | 0.8 | 1 (1.4) | MEM-IPM-CRO-CAZ-FEP-ATM-CSL-TZP-LVX-AMK     |
| A25 | 10 | 0.8 | 1 (1.4) | MEM-IPM-CRO-FEP-ATM-CSL-TZP-CIP-LVX-AMK     |
| A26 | 9  | 0.7 | 1 (1.4) | MEM-IPM-CRO-CAZ-FEP-ATM-CSL-TZP-CIP         |
| A27 | 9  | 0.7 | 1 (1.4) | MEM-IPM-CRO-CAZ-FEP-ATM-CSL-TZP-LVX         |
| A28 | 9  | 0.7 | 1 (1.4) | MEM-IPM-CRO-CAZ-FEP-ATM-CSL-CIP-LVX         |
| A29 | 8  | 0.6 | 1 (1.4) | MEM-IPM-CRO-CAZ-FEP-ATM-CSL-TZP             |
| A30 | 8  | 0.6 | 1 (1.4) | MEM-IPM-CRO-CAZ-FEP-ATM-CIP-LVX             |
| A31 | 8  | 0.6 | 3 (4.1) | MEM-IPM-CRO-CAZ-FEP-CSL-TZP-CIP             |
| A32 | 8  | 0.6 | 1 (1.4) | MEM-IPM-CRO-FEP-ATM-CIP-LVX-AMK             |
| A33 | 7  | 0.5 | 1 (1.4) | MEM-IPM-ETM-CRO-FEP-ATM-MIN                 |
| A34 | 6  | 0.8 | 2 (2.7) | MEM-IPM-ATM-CSL-LVX-AMK                     |
| A35 | 6  | 0.5 | 1 (1.4) | MEM-IPM-CRO-FEP-ATM-CSL                     |
| A36 | 6  | 0.5 | 1 (1.4) | MEM-IPM-ETM-CRO-FEP-ATM                     |
| A37 | 6  | 0.5 | 1 (1.4) | MEM-IPM-ETM-CRO-FEP-TGC                     |
| A38 | 6  | 0.3 | 1 (1.4) | ETM-CCL-CRO-CAZ-FEP-TGC                     |
| A39 | 5  | 0.6 | 3 (4.1) | MEM-IPM-ATM-CSL-LVX                         |
| A40 | 4  | 0.5 | 2 (2.7) | MEM-IPM-ATM-CSL                             |
| A41 | 4  | 0.3 | 1 (1.4) | IPM-CRO-FEP-ATM                             |
| A42 | 4  | 0.3 | 1 (1.4) | MEM-IPM-CRO-FEP                             |
| A43 | 3  | 0.3 | 1 (1.4) | MEM-CRO-FEP                                 |
| A44 | 2  | 0.3 | 1 (1.4) | MEM-IPM                                     |

MEM, meropenem; IPM, imipenem; ETM, ertapenem; CCL, cefaclor; CRO, ceftriaxone; CAZ, ceftazidime; FEP, cefepime; ATM, aztreonam; CSL, cefoperazone and sulbactam; CIP, ciprofloxacin; LVX, levofloxacin; CHL, chloramphenicol; TZP, piperacillin and tazobactam; TGC, tigecycline; MIN, minocycline; FOS, fosfomicin; AMK, amikacin; CO, Colistin. \* Multiple antibiotic resistance index (MARI) was measured as a/b, where a = the total number of antibiotics to which an isolate was resistant and b = the total number of antibiotics tested.

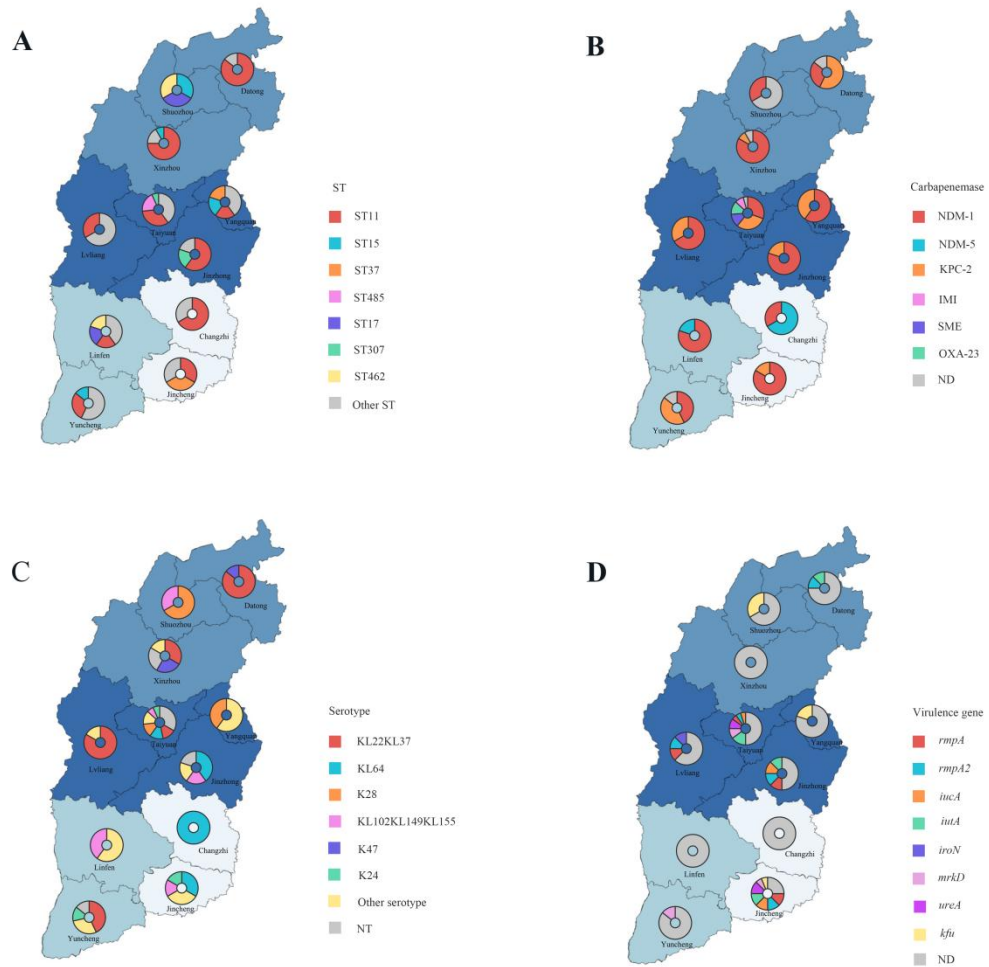

Figure S1. Distribution of ST (A), carbapenemase (B), seroytpe (C) and virulence gene (D) of Carbapenem-Resistant *Klebsiella pneumoniae* in different cities of Shanxi, China. ST, sequencing type; NT, non typable; ND, none detected.

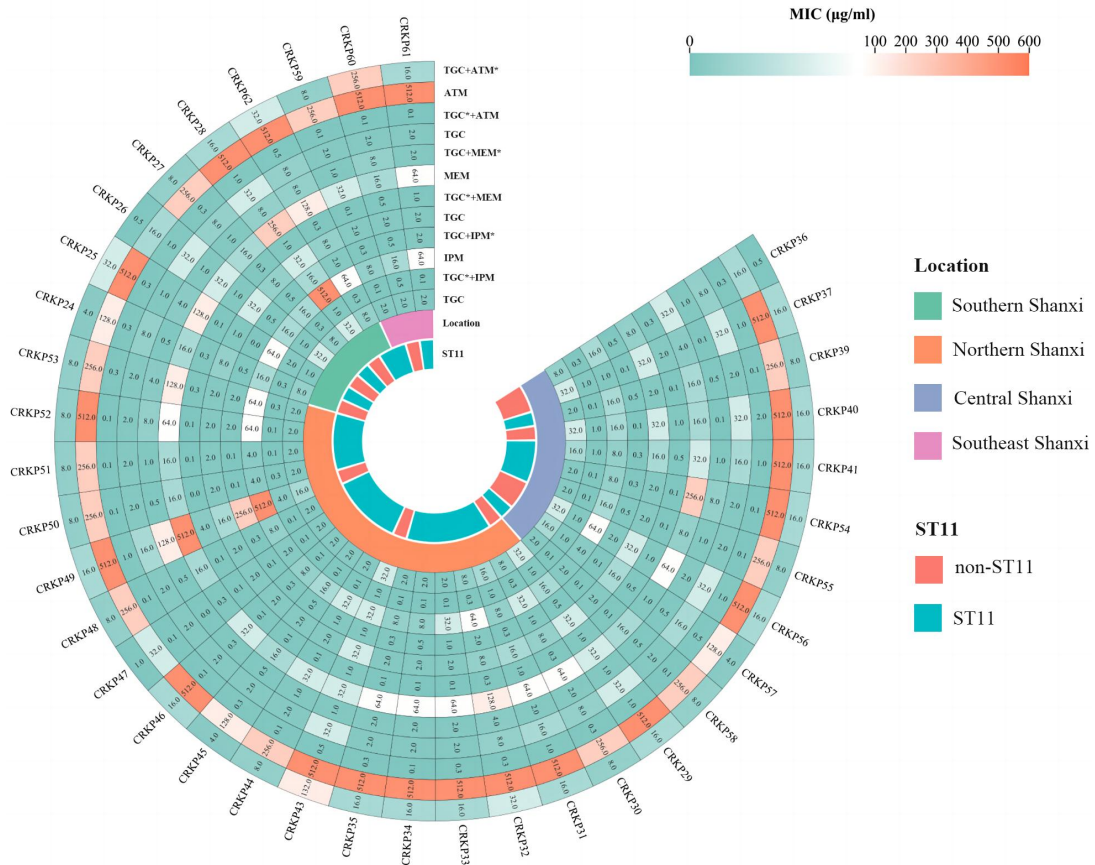

Figure S2. Results of combination therapy. TGC, tigecycline; IPM, imipenem; MEM, meropenem; ATM, aztreonam. ST, sequencing type; NT, non typable. \* Minimum inhibitory concentration (MIC) of the antibiotic after combination therapy.
